# Supplementary material
Source: Research Square preprint supplement (doi:10.21203/rs.3.rs-8598969/v1)
Supplement: Supplementary file 1 [file 0bb559291556b4f08901b879.docx]

Q1

The primary biomechanical rationale for maintaining a minimum axial wall height during full-coverage crown preparation is to: A. Increase resistance to occlusal forces

B. Reduce cement film thickness

C. Improve marginal adaptation

D. Prevent pulpal irritation

Answer: A

Explanation: Axial wall height directly affects resistance form, especially against tipping forces—not retention or marginal fit.

Q2

For a full metal crown preparation on a mandibular molar, reducing total occlusal convergence (TOC) from 20° to 6° primarily increases: A. Resistance form only

B. Retention form only

C. Both retention and resistance

D. Neither retention nor resistance

Answer: C

Explanation: Lower TOC enhances cement shear resistance (retention) and resistance to dislodging forces.

Q3

Which preparation error most significantly compromises resistance form while having minimal effect on retention? A. Excessive occlusal reduction

B. Short axial walls

C. Excessive TOC

D. Over-tapered finish line

Answer: B

Explanation: Short axial walls dramatically reduce resistance to tipping, even if taper remains ideal.

Q4

When preparing a tooth with a short clinical crown, the most effective modification to improve resistance form is: A. Increasing cement strength

B. Adding auxiliary grooves

C. Reducing TOC further

D. Increasing occlusal reduction

Answer: B

Explanation: Auxiliary features (grooves/boxes) add resistance when wall height is inadequate.

Q5

Which factor has the greatest influence on crown retention when using conventional luting cement? A. Surface roughness of preparation

B. Height of preparation

C. Type of finish line

D. Occlusal anatomy

Answer: B

Explanation: Preparation height is the dominant determinant of retention with conventional cements.

Q6

In a tooth with pronounced cervical concavity, the most critical risk during preparation is: A. Marginal overextension

B. Undercut formation

C. Loss of resistance form

D. Excessive taper

Answer: B

Explanation: Cervical concavities predispose to undercuts, especially during axial reduction.

Q7

Which finish line provides the greatest structural durability for all-ceramic crowns under high occlusal load? A. Knife-edge

B. Chamfer

C. Heavy chamfer

D. Shoulder with rounded internal angle

Answer: D

Explanation: A rounded shoulder provides optimal ceramic bulk and stress distribution.

Q8

Excessive occlusal reduction primarily compromises: A. Retention

B. Resistance

C. Structural durability of restoration

D. Cement seal

Answer: C

Explanation: Over-reduction weakens restorative material, not retention or resistance directly.

Q9

Which statement regarding finish line location is MOST accurate? A. Subgingival margins always improve retention

B. Supragingival margins always reduce esthetics

C. Subgingival margins increase periodontal risk

D. Equigingival margins are contraindicated

Answer: C

Explanation: Subgingival margins increase plaque retention and periodontal inflammation risk.

Q10

For a maxillary incisor prepared for a ceramic crown, inadequate lingual reduction most commonly results in: A. Open facial margin

B. Overcontoured restoration

C. Poor esthetics only

D. Increased retention

Answer: B

Explanation: Insufficient reduction forces lab to bulk ceramic → overcontour, affecting function and hygiene.

Q11

Which preparation design MOST effectively resists rotational dislodgement? A. Increased TOC

B. Parallel axial walls

C. Single proximal groove

D. Occlusal bevel

Answer: C

Explanation: Proximal grooves are the most effective anti-rotational features.

Q12

The biologic width is most likely to be violated when: A. Chamfer margins are used

B. Shoulder margins are used

C. Margins are placed subgingivally

D. Tooth preparation is supragingival

Answer: C

Explanation: Margin location, not design, determines biologic width violation.

Q13

Which clinical situation MOST justifies intentional subgingival margin placement? A. Caries-free tooth

B. Short clinical crown

C. Esthetic zone with high smile line

D. Poor oral hygiene

Answer: C

Explanation: Esthetics—not retention—is the primary indication for subgingival margins.

Q14

Loss of resistance form is MOST likely when: A. TOC exceeds 16°

B. Cement thickness is excessive

C. Occlusal reduction is inadequate

D. Finish line is chamfered

Answer: A

Explanation: High TOC dramatically reduces resistance to lateral forces.

Q15

Which statement BEST describes the relationship between retention and resistance form? A. They are independent

B. Improving retention always improves resistance

C. Resistance can exist without retention

D. Retention can exist without resistance

Answer: D

Explanation: A crown may resist vertical dislodgement (retention) yet fail under tipping forces (poor resistance).
